# Supplementary material for: Biomass burning impact on PM 2.5 over the southeastern US during 2007: integrating chemically speciated FRM filter measurements, MODIS fire counts and PMF analysis
Source: Copernicus journal article supplement (doi:10.5194/acp-10-6839-2010), 2010-07-23
Supplement: Supplementary file 1 [file acp-10-6839-2010-supplement.pdf]

## Supplementary material

### **Biomass burning impact on PM<sub>2.5</sub> over the southeastern U.S. during 2007: Integrating chemically speciated FRM filter measurements, MODIS fire counts and PMF analysis**

**Xiaolu Zhang<sup>1</sup>, Arsineh Hecobian<sup>1</sup>, Mei Zheng<sup>1</sup>, Neil H. Frank<sup>2</sup>, Rodney J. Weber<sup>1</sup>**

[1]{School of Earth and Atmospheric Sciences, Georgia Institute of Technology, Atlanta, Georgia}

[2]{Office of Air Quality Planning & Standards, U.S. Environmental Protection Agency, 109 TW Alexander Drive, Research Triangle Park, NC, USA}

Correspondence to: Xiaolu Zhang (xzhang3@mail.gatech.edu)

Table S1. Seasonal and annual source contributions of each PMF factor to PM<sub>2.5</sub> mass (% of PM<sub>2.5</sub> mass) based on FRM and Speciation datasets. Winter (J, F, D), Spring (M, A, M), Summer (J, J, A) and Fall (S, O, N).

Figure S1. Composition profiles (% of total of each species) for the five factors resolved by PMF based on FRM and Speciation datasets for the whole year (2007) at 7 EPA (urban) FRM/Speciation sites (left panel), and the time series of relative contribution of each factor (right panel). Factors 1 through 4 are similar to those in Fig. 9. Factor 5 has characteristics of a mobile source emission profile.

Figure S2. PMF results based on FRM and Speciation datasets showing annually averaged source contributions of the five factors to PM<sub>2.5</sub> mass, WSOC, levoglucosan, and water-soluble K<sup>+</sup> for 7 EPA (urban) FRM/Speciation sites.

1 Table S1. Seasonal and annual source contributions of each PMF factor to PM<sub>2.5</sub> mass (% of  
 2 PM<sub>2.5</sub> mass) based on FRM and Speciation datasets. Winter (J, F, D), Spring (M, A, M),  
 3 Summer (J, J, A) and Fall (S, O, N).

|                               | Winter | Spring | Summer | Fall | Annual |
|-------------------------------|--------|--------|--------|------|--------|
| Biomass Burning (F1)          | 29     | 15     | 1      | 8    | 13     |
| Refractory (F2)               | 11     | 15     | 14     | 14   | 13     |
| Secondary Light Abs WSOC (F3) | 10     | 22     | 24     | 17   | 20     |
| Secondary Sulfate/WSOC (F4)   | 29     | 34     | 47     | 45   | 39     |
| Mobile source emission (F5)   | 9      | 9      | 7      | 9    | 8      |
| Residual                      | 12     | 5      | 7      | 7    | 7      |

4

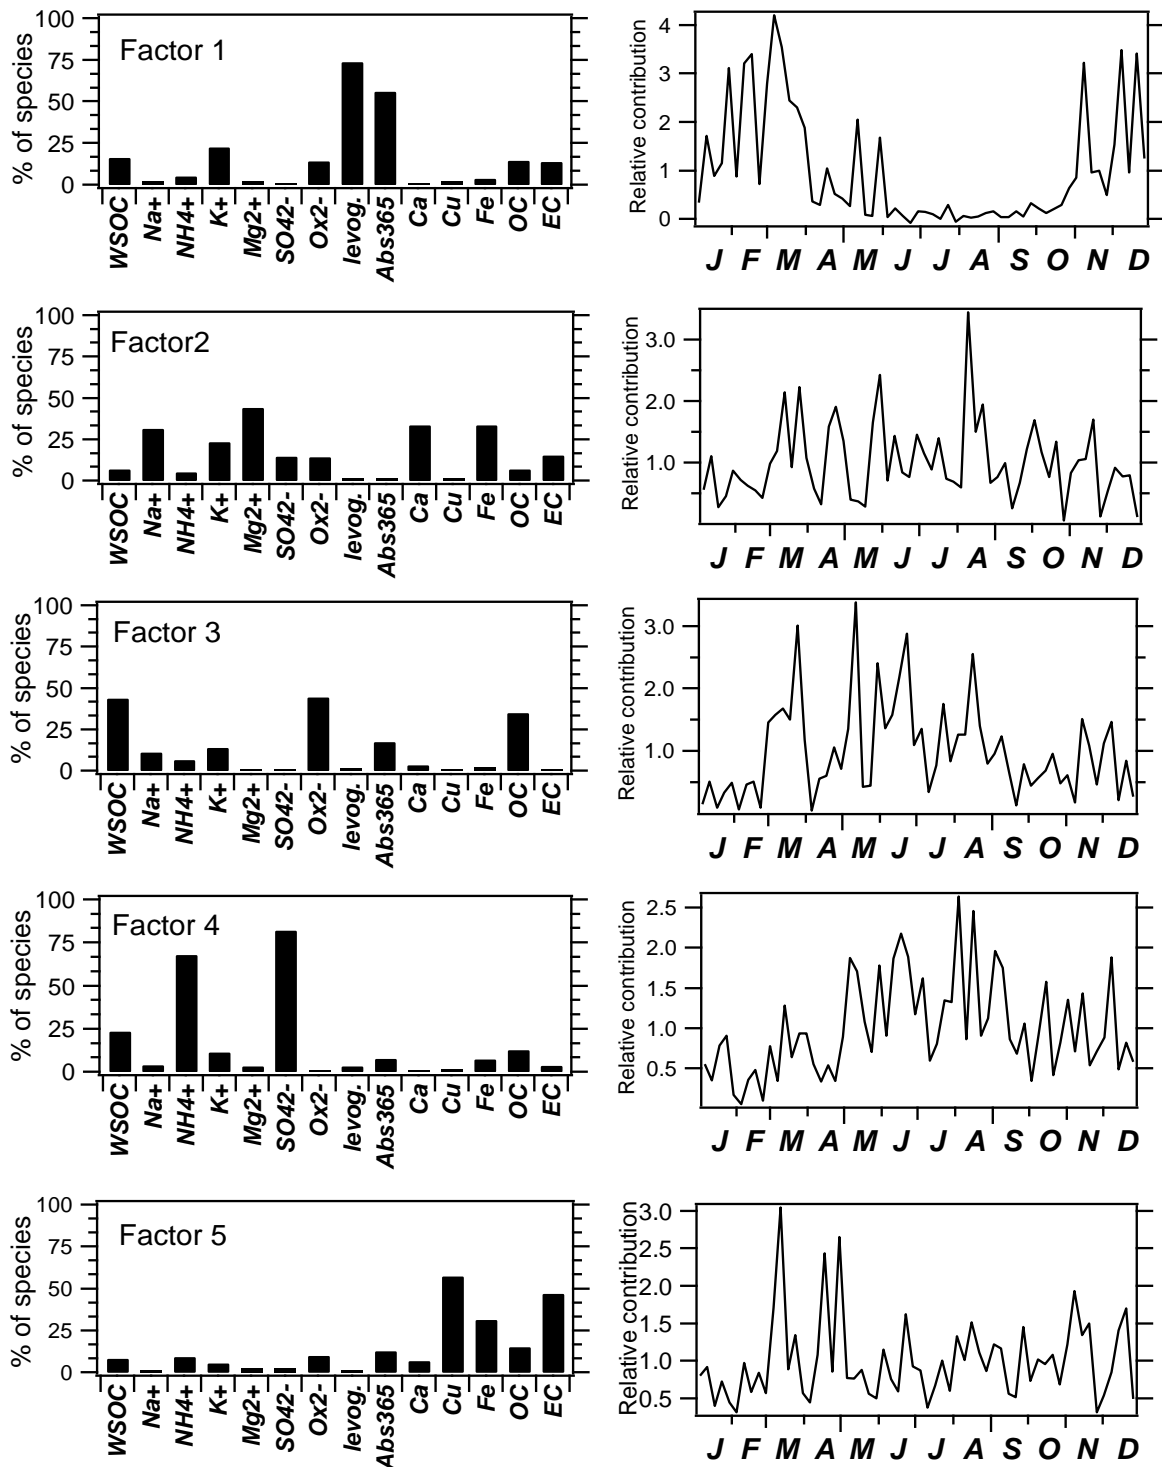

1  
 2 Figure S1. Composition profiles (% of total of each species) for the five factors resolved by  
 3 PMF based on FRM and Speciation datasets for the whole year (2007) at 7 EPA (urban)  
 4 FRM/Speciation sites (left panel), and the time series of relative contribution of each factor  
 5 (right panel). Factors 1 through 4 are similar to those in Fig. 9. Factor 5 has characteristics of  
 6 a mobile source emission profile.

### PM2.5 mass

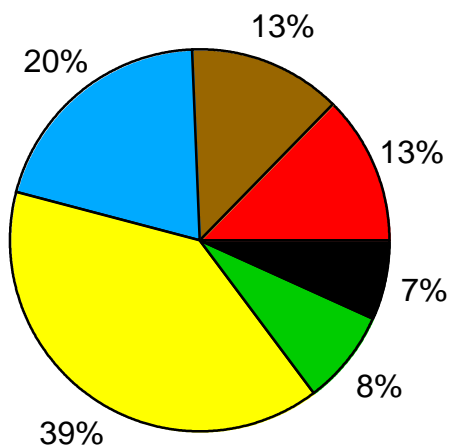

### WSOC

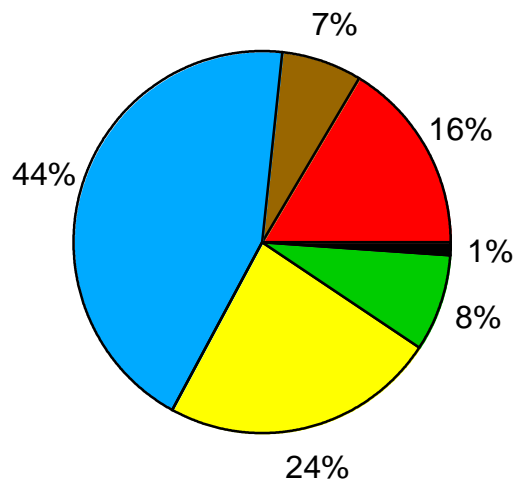

### levoglucosan

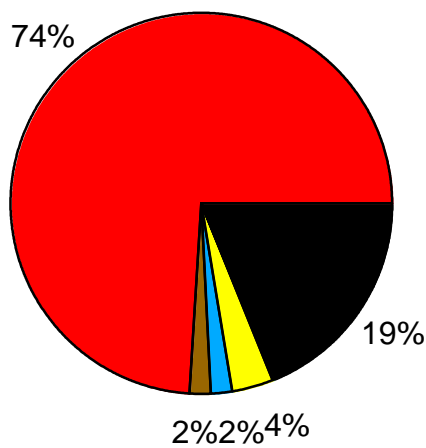

### water-soluble K<sup>+</sup>

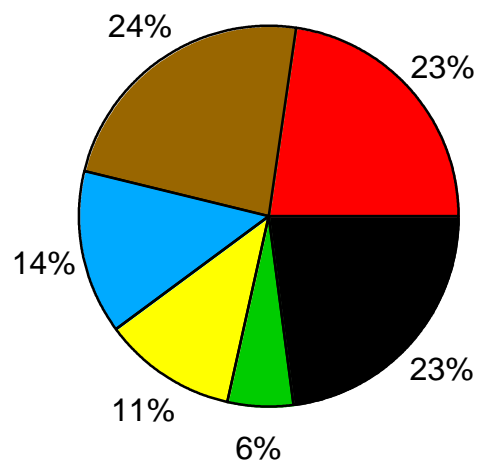

- F1 - biomass burning      ■ F2 - refractory material
- F3 - secondary light absorbing WSOC
- F4 - secondary sulfate/WSOC
- F5 - mobile source emission      ■ residual

1  
2

3 Figure S2. PMF results based on FRM and Speciation datasets showing annually averaged  
4 source contributions of the five factors to PM<sub>2.5</sub> mass, WSOC, levoglucosan, and water-  
5 soluble K<sup>+</sup> for 7 EPA (urban) FRM/Speciation sites.
